# Supplementary material for: The role of MgB12H12 in the hydrogen desorption process of Mg(BH4)2
Source: Royal Society of Chemistry journal article supplement (doi:10.1039/c4cc05266h), 2014-11-19
Supplement: c4cc05266h1.pdf [file c4cc05266h1.pdf]

## Electronic Supplementary Information

### Experimental

The reference samples of amorphous boron and  $\text{Mg}(\text{BH}_4)_2$  (purities > 95%) were purchased from Sigma-Aldrich and  $\text{K}_2\text{B}_{12}\text{H}_{12}$  from Katchem.  $\text{MgB}_{12}\text{H}_{12}$  was synthesized via the reaction between  $\text{Mg}(\text{BH}_4)_2$  and  $\text{B}_2\text{H}_6$ .  $^1\text{D}_2\text{O}$  and anhydrous  $\text{DMSO-d}_6$  ( $d_6$  means all the six hydrogen atoms ("H") in DMSO are replaced with their isotope deuterium ("D")) were purchased from ARMAR Chemicals.

To perform the decomposition of  $\text{Mg}(\text{BH}_4)_2$ , 150 mg of sample was filled in a stainless steel autoclave which was sealed air tight and transferred into a custom-made pressure-composition-temperature (*pcT*) apparatus.<sup>2</sup> Initially the sample was evacuated at room temperature to a vacuum below  $10^{-4}$  mbar and subsequently heated to different temperatures at a vacuum of  $10^{-4}$  mbar. The amounts of hydrogen released during the heating process were recorded via a mass flow controller/meter connected to the *pcT* apparatus. The  $\text{Mg}(\text{BH}_4)_2$  samples after heating at different temperature from 265 to 500°C were cooled to room temperature for characterization by X-ray diffraction (XRD), FT-IR, and  $^{11}\text{B}$  NMR. The rehydrogenation was carried out at 265°C and 160 bar  $\text{H}_2$  for 20h. Throughout this study, the samples were handled in a glove box filled with purified Ar gas ( $\text{H}_2\text{O} < 1$  ppm,  $\text{O}_2 < 1$  ppm).

XRD measurements were performed using a Bruker D8 diffractometer equipped with a Goebel mirror selecting Cu  $\text{K}\alpha$  radiation ( $\lambda = 1.5418 \text{ \AA}$ ) and a linear detector system (Vantec). Samples for XRD measurements were filled and sealed under an argon atmosphere into glass capillaries (diameter 0.7 mm; wall thickness 0.01 mm).

FT-IR measurements were carried out at room temperature under protective Ar atmosphere using a Bruker Alpha spectrometer equipped with a platinum ATR single reflection diamond ATR module.

$^{11}\text{B}$  magic angle spinning (MAS) NMR experiments were performed at 128.38 MHz on a Bruker Avance 400 NMR spectrometer using a 4 mm CP-MAS probe at room temperature. The spectra were recorded at 12 kHz sample rotation applying a "Hahn echo" pulse sequence for suppression of the probe background signal. Pulse lengths of 1.5  $\mu\text{s}$  ( $\pi/12$  pulse) and 3.0  $\mu\text{s}$  were applied for the  $^{11}\text{B}$  excitation and echo pulses, respectively and during acquisition xy kHz SPINAL64 decoupling of the  $^1\text{H}$  frequency was applied.

$^{11}\text{B}$  solution-state NMR spectra were recorded on a 5 mm inverse broadband probe at 298 K. The as-prepared samples were homogeneously ground under inert atmosphere for 5 min. For each measurement, amounts of  $\approx 10$  mg solid samples and about 5 mL of water or DMSO were weighed into tight vials and the suspensions were stirred on a shaker (KS 250, JANKE & KUNKEL, IKA Labortechnik) for at least half an hour to facilitate dissolution. Undissolved solids were removed by filtration of the suspensions over Celite.  $^{11}\text{B}$  NMR chemical shifts are reported in parts per million (ppm), externally referenced to a 1.0 M  $\text{B}(\text{OH})_3$  aqueous solution at 19.6 ppm, and  $^1\text{H}$  NMR chemical shifts are referenced to the resonances of water (4.7 ppm) or DMSO (2.49 ppm). For the quantitative analysis of boron-containing species in solution, a DMSO (12 mM) and an aqueous solution (46 mM) of  $\text{K}_2\text{B}_{12}\text{H}_{12}$  were used as external references. The concentrations of soluble species were determined by comparing the resonance areas of measured species with that of the reference sample applying the ERETIC method.<sup>3</sup>

### References

1. A. Remhof, Y. Yan, D. Rentsch, A. Borgschulte, C. M. Jensen and A. Züttel, *Journal of Materials Chemistry A*, 2014, **2**, 6.
2. M. Biemann, S. Kato, P. Mauron, A. Borgschulte and A. Züttel, *Rev Sci Instrum*, 2009, **80**.
3. D. I. Hoult, *Concept Magnetic Res*, 2000, **12**, 173-187.
4. Y. G. Yan, A. Remhof, P. Mauron, D. Rentsch, Z. Lodziana, Y. S. Lee, H. S. Lee, Y. W. Cho and A. Züttel, *J Phys Chem C*, 2013, **117**, 8878-8886.

**Figure S1**

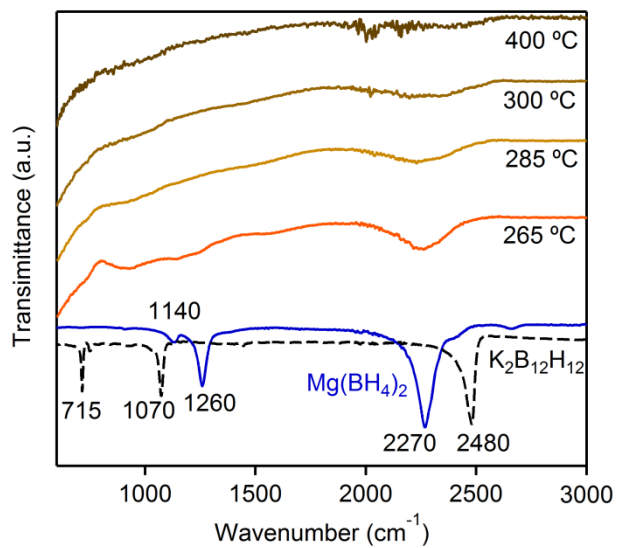

**Fig. S1** FT-IR spectra of  $\text{Mg}(\text{BH}_4)_2$  decomposed at 265°C (20 h), 285°C (20 h), 300°C (20 h), and 400°C (2 h), and reference samples  $\text{Mg}(\text{BH}_4)_2$  and  $\text{K}_2\text{B}_{12}\text{H}_{12}$ .

**Figure S2**

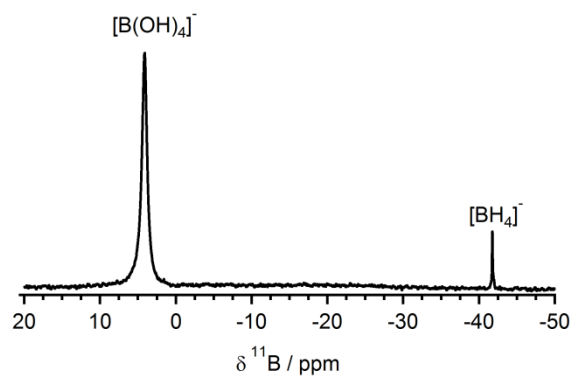

**Fig. S2** Solution-state  $^{11}\text{B}$  NMR spectrum of hydrolysis products of  $\text{Mg}(\text{BH}_4)_2$  in  $\text{D}_2\text{O}$ .

**Figure S3**

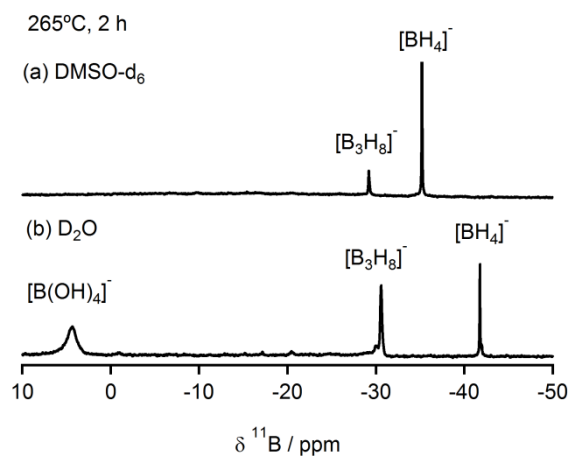

**Fig. S3** <sup>11</sup>B NMR spectra of Mg(BH<sub>4</sub>)<sub>2</sub> decomposed at 265°C for 2h, after dissolution in (a) DMSO and (b) D<sub>2</sub>O. Smaller ratio of [BH<sub>4</sub>]<sup>-</sup> to [B<sub>3</sub>H<sub>8</sub>]<sup>-</sup> in D<sub>2</sub>O may be due to the hydrolysis of [BH<sub>4</sub>]<sup>-</sup>. Different solvents also cause different chemical shifts for [BH<sub>4</sub>]<sup>-</sup> and [B<sub>3</sub>H<sub>8</sub>]<sup>-</sup>.

**Figure S4**

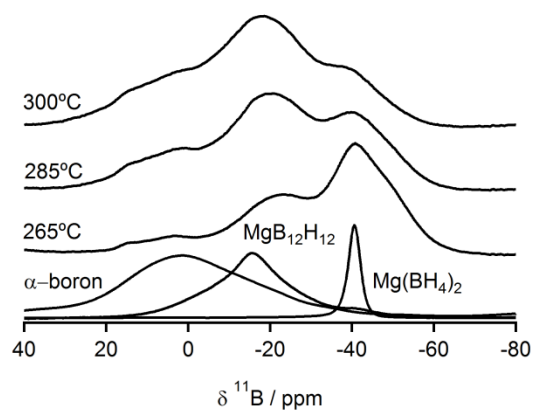

**Fig. S4**  $^{11}\text{B}$  MAS NMR spectra of  $\text{Mg}(\text{BH}_4)_2$  decomposed at 265°C (20 h), 285°C (20 h), and 300°C (20 h), referred to  $\text{Mg}(\text{BH}_4)_2$ ,  $\text{MgB}_{12}\text{H}_{12}$  and amorphous boron. The shoulders between 0 to 20 ppm were attributed to boron oxides.<sup>4</sup>

**Figure S5**

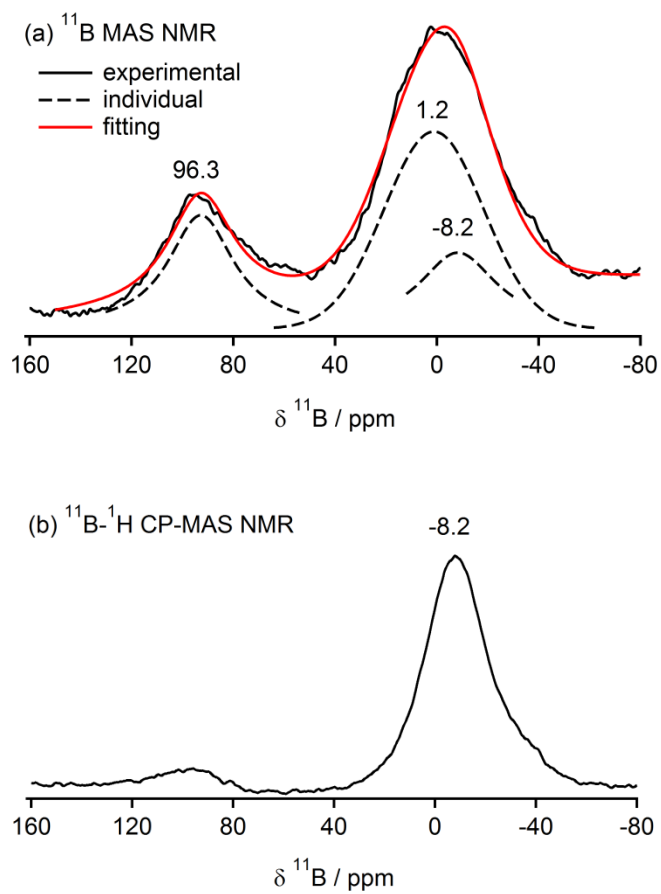

**Fig. S5** (a)  $^{11}\text{B}$  MAS NMR and (b)  $^{11}\text{B}$ - $^1\text{H}$  CP-MAS NMR spectra of  $\text{Mg}(\text{BH}_4)_2$  decomposed at  $400^\circ\text{C}$  for 2 h. The MAS NMR spectrum was deconvoluted into three individuals at  $-8.2$ ,  $1.2$  and  $96.3$  ppm, respectively.

Figure S6

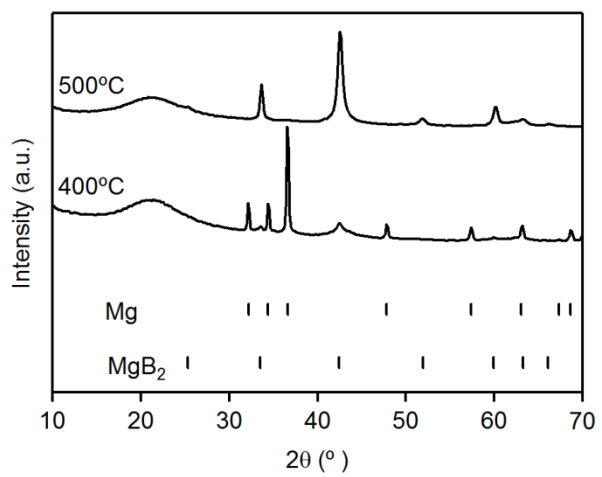

Fig. S6 XRD patterns of Mg(BH<sub>4</sub>)<sub>2</sub> decomposed at 400°C for 2 h and 500°C for 1h.
